# Supplementary material for: A Computational Framework for Bioimaging Simulation
Source: PLOS journal article supplement (doi:10.1371/journal.pone.0130089), 2015-07-06
Supplement: S2 (10.1371/journal.pone.0130089.s002) [file journal.pone.0130089.s002]

## S2 Text. Details of *in vitro* image comparison

### (1) HaloTag-TMR molecules on glass surface

***In vitro* Experiment :** HaloTag-TMR molecules were provided by Dr. Masahiro Ueda, laboratory for cell signaling dynamics, RIKEN QBiC. Data was taken by Dr. Satomi Matsuoka, laboratory for cell signaling dynamics, RIKEN QBiC. The molecules were distributed on glass surface, and observed using total internal reflection microscopy with 60X/1.40NA objective (Nikon). Fluorescent images of the HaloTag-TMR molecules are acquired with an EMCCD camera (iXon+, Andor). The images were obtained at a 30 msec exposure time.

**Particle model :** We constructed simple model of 100 stationary HaloTag tetramethyl rhodamine (TMR) molecules distributed on glass surface.

**Simulated imaging :** We simulated imaging the basal region of the particle model for the specification and condition of the TIRFM simulation module shown in Table S2.1.

|                       |                                              |
|-----------------------|----------------------------------------------|
| Beam flux density     | 20, 30, 40, 50 W/cm <sup>2</sup>             |
| Beam wavelength       | 488nm                                        |
| Refraction index      | 1.33 (glass), 1.27 (water)                   |
| Critical angle        | 65.6°                                        |
| Fluorophore           | HaloTag TMR ligand (Abs. 555 nm/ Em. 585 nm) |
| Objective             | × 60 / N.A. 1.40                             |
| Dichroic mirror       | Semrok FF-562-Di03                           |
| Emission filter       | Semrok FF-593-25/40                          |
| Linear conversion     | 10 <sup>-6</sup>                             |
| Tube lens             | × 3.3                                        |
| Optical magnification | × 198                                        |
| Camera type           | EMCCD (iXon+ Andor)                          |
| Image size            | 512 × 512                                    |
| Pixel size            | 16 μm                                        |
| QE                    | 92 %                                         |
| EM Gain               | × 300                                        |
| Exposure time         | 30 msec                                      |
| Readout noise         | 100 electrons                                |
| Full well             | 180,000 electrons                            |
| Dynamic range         | 71.1 dB                                      |
| Excess noise          | √2                                           |
| A/D Converter         | 16-bit                                       |
| Gain                  | 11.1 electrons/count                         |
| Offset                | 100 counts                                   |
| Optical background    | 1.0 photons/pixel                            |

S2 Table S2.1: TIRFM specifications and condition to image the simple particle model of fluorescent molecules.

## Expected images

## Simulated images

Beam flux density : 20 W/cm<sup>2</sup>

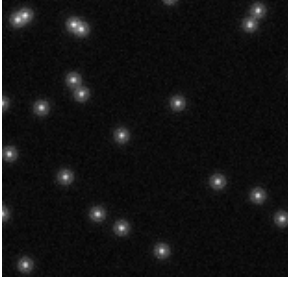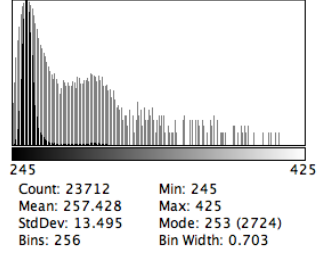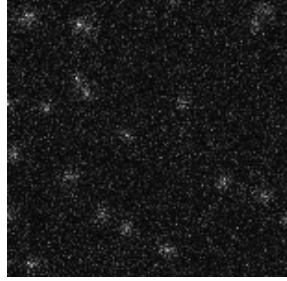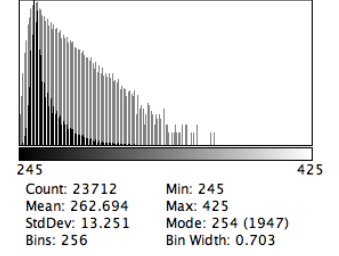

Beam flux density : 30 W/cm<sup>2</sup>

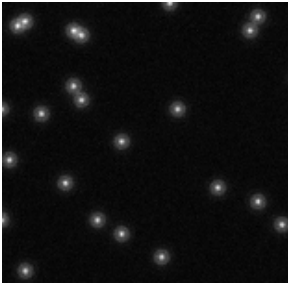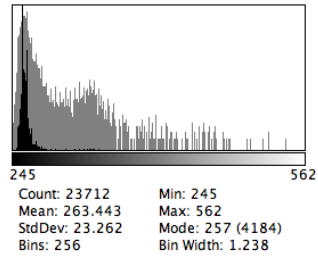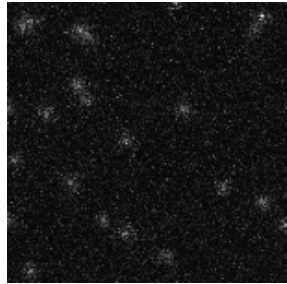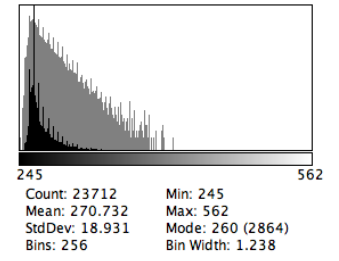

Beam flux density : 40 W/cm<sup>2</sup>

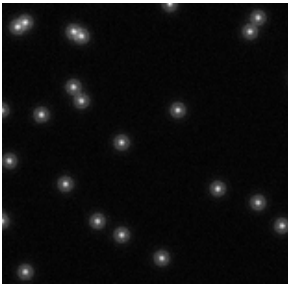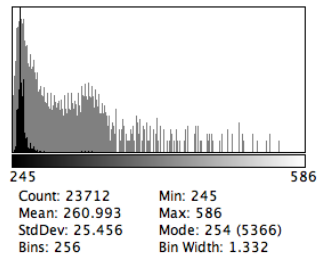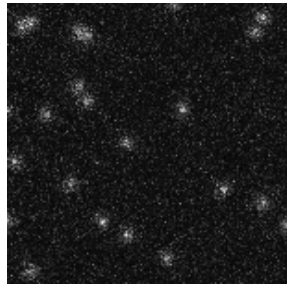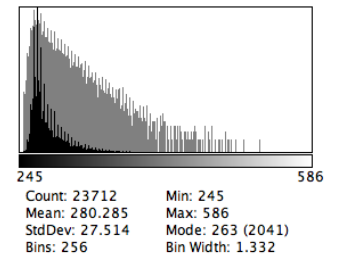

Beam flux density : 50 W/cm<sup>2</sup>

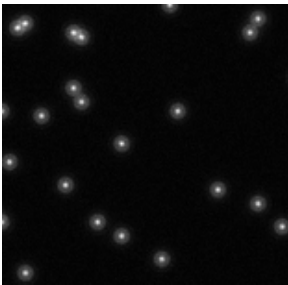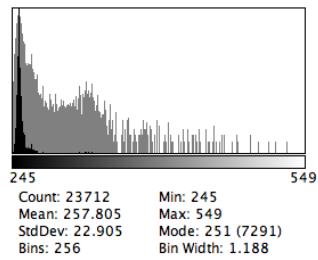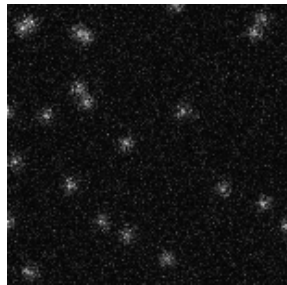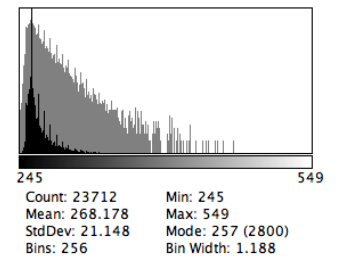

S2 Fig. S2.1: Comparison of *in vitro* images (156 × 152 pixels) and intensity histograms. Log-scaled intensity histograms are shown in grey color.

### Simulated images

### Actual images

Beam flux density : 20 W/cm<sup>2</sup>

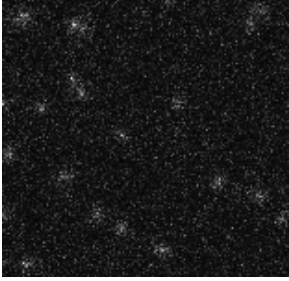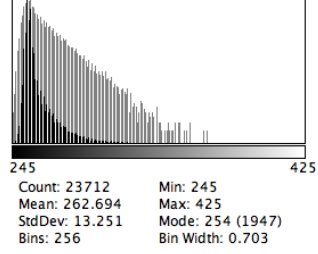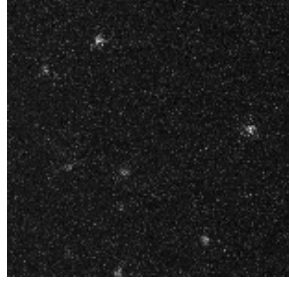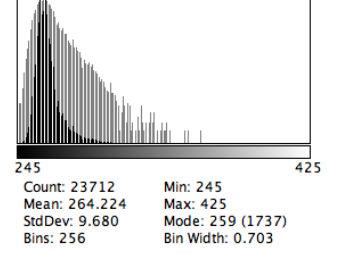

Beam flux density : 30 W/cm<sup>2</sup>

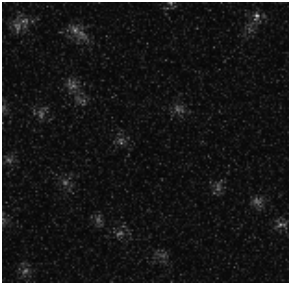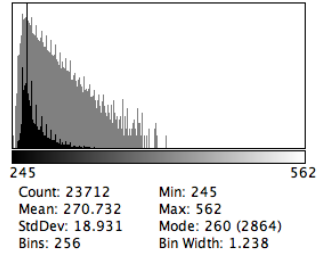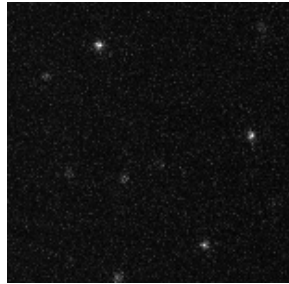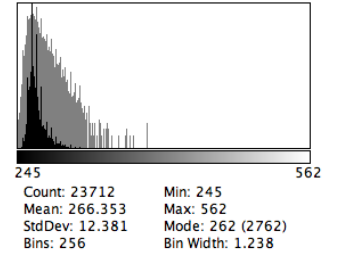

Beam flux density : 40 W/cm<sup>2</sup>

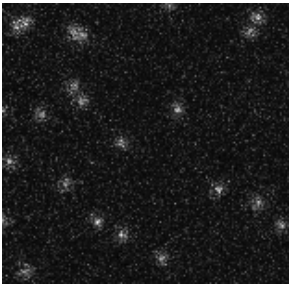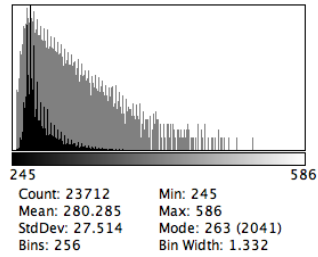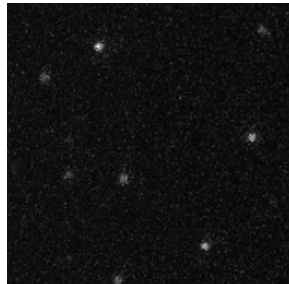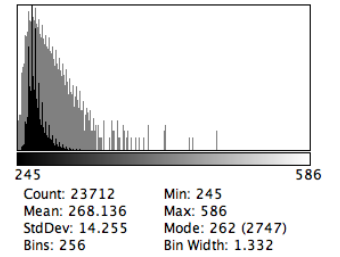

Beam flux density : 50 W/cm<sup>2</sup>

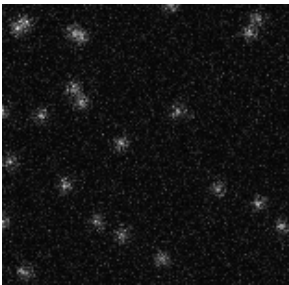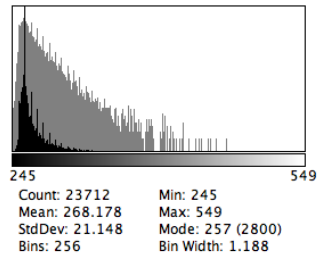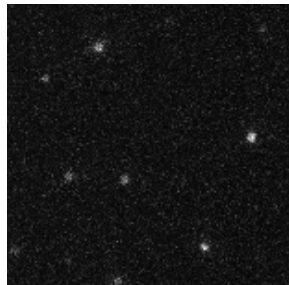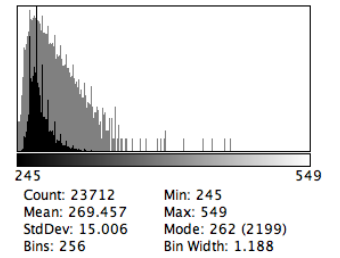

S2 Fig. S2.2: Comparison of *in vitro* images (156 × 152 pixels) and intensity histograms. Log-scaled intensity histograms are shown in grey color.

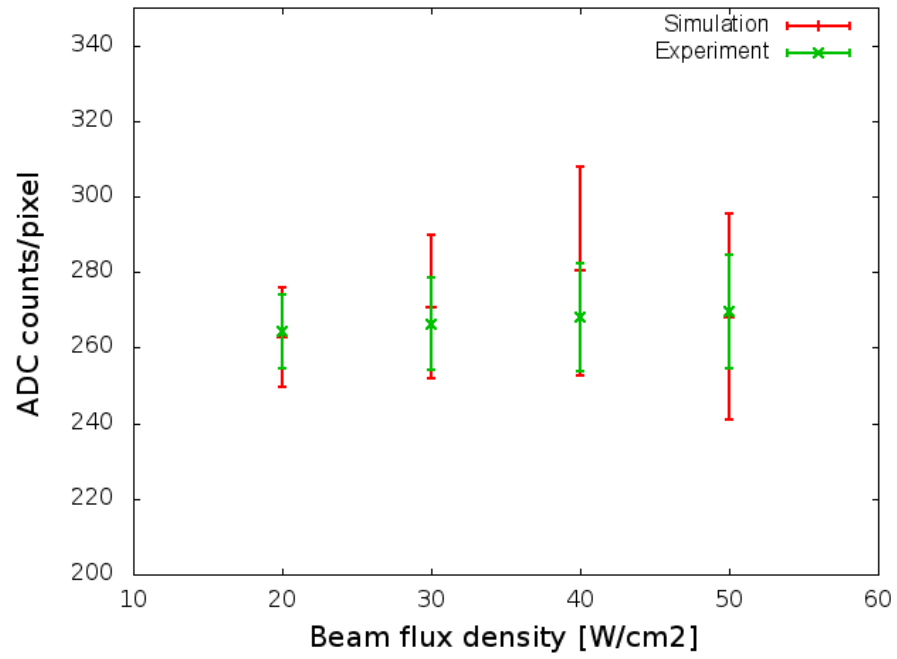

S2 Fig. S2.3: Linearity is shown for various beam flux density. Experiment (green) and simulation (red).

## (2) HaloTag-TMR molecules in aqueous solution

**In vitro Experiment :** HaloTag-TMR molecules were provided by Dr. Masahiro Ueda, laboratory for cell signaling dynamics, RIKEN QBiC. Data was taken by Dr. Satomi Matsuoka, laboratory for cell signaling dynamics, RIKEN QBiC. 5 nM concentration of HaloTag-TMR molecules in aqueous solution were observed using a laser scanning confocal microscope (A1; Nikon, Japan) with 60X/1.40NA objective (Nikon). Images of the HaloTag-TMR molecules were obtained at a time resolution of 1 sec.

**Particle model :** We constructed the particle model of 19,656 HaloTag-TMR molecules fast diffusing with  $100 \mu\text{m}^2/\text{sec}$  and distributed in  $30 \times 30 \times 6 \mu\text{m}^3$  box of aqueous solutions.

**Simulated imaging :** We simulated imaging the middle region of the particle model for the specification and condition of the LSCM simulation module shown in Table S2.2.

|                       |                                              |
|-----------------------|----------------------------------------------|
| Beam flux             | 5, 10, 30, 50, 100 $\mu\text{W}$             |
| Beam wavelength       | 512 nm                                       |
| Beam waist            | 400 nm (Assumed)                             |
| Fluorophore           | HaloTag TMR ligand (Abs. 555 nm/ Em. 585 nm) |
| Objective             | $\times 60$ / N.A. 1.49                      |
| Scan lens             | $\times 1$                                   |
| Pinhole               | 57.6 $\mu\text{m}$ diameter (2 A.U)          |
| Optical magnification | $\times 60$                                  |
| Linear conversion     | $10^{-6}$                                    |
| Scan time             | 0.95 $\mu\text{sec}/\text{pixel}$            |
| Pixel length          | 207.16 nm/pixel                              |
| Image size            | $1024 \times 1024$                           |
| PMT mode              | Photon-counting                              |
| A/D Converter         | 12-bit                                       |
| Gain                  | 1.025 electrons/count                        |
| Offset                | 100 counts                                   |
| Readout noise         | 0 counts/sec                                 |
| Excess noise          | N/A                                          |
| Optical background    | 0 photons                                    |

S2 Table S2.2: LSCM specifications and condition to image the simple particle model of fluorescent molecules.

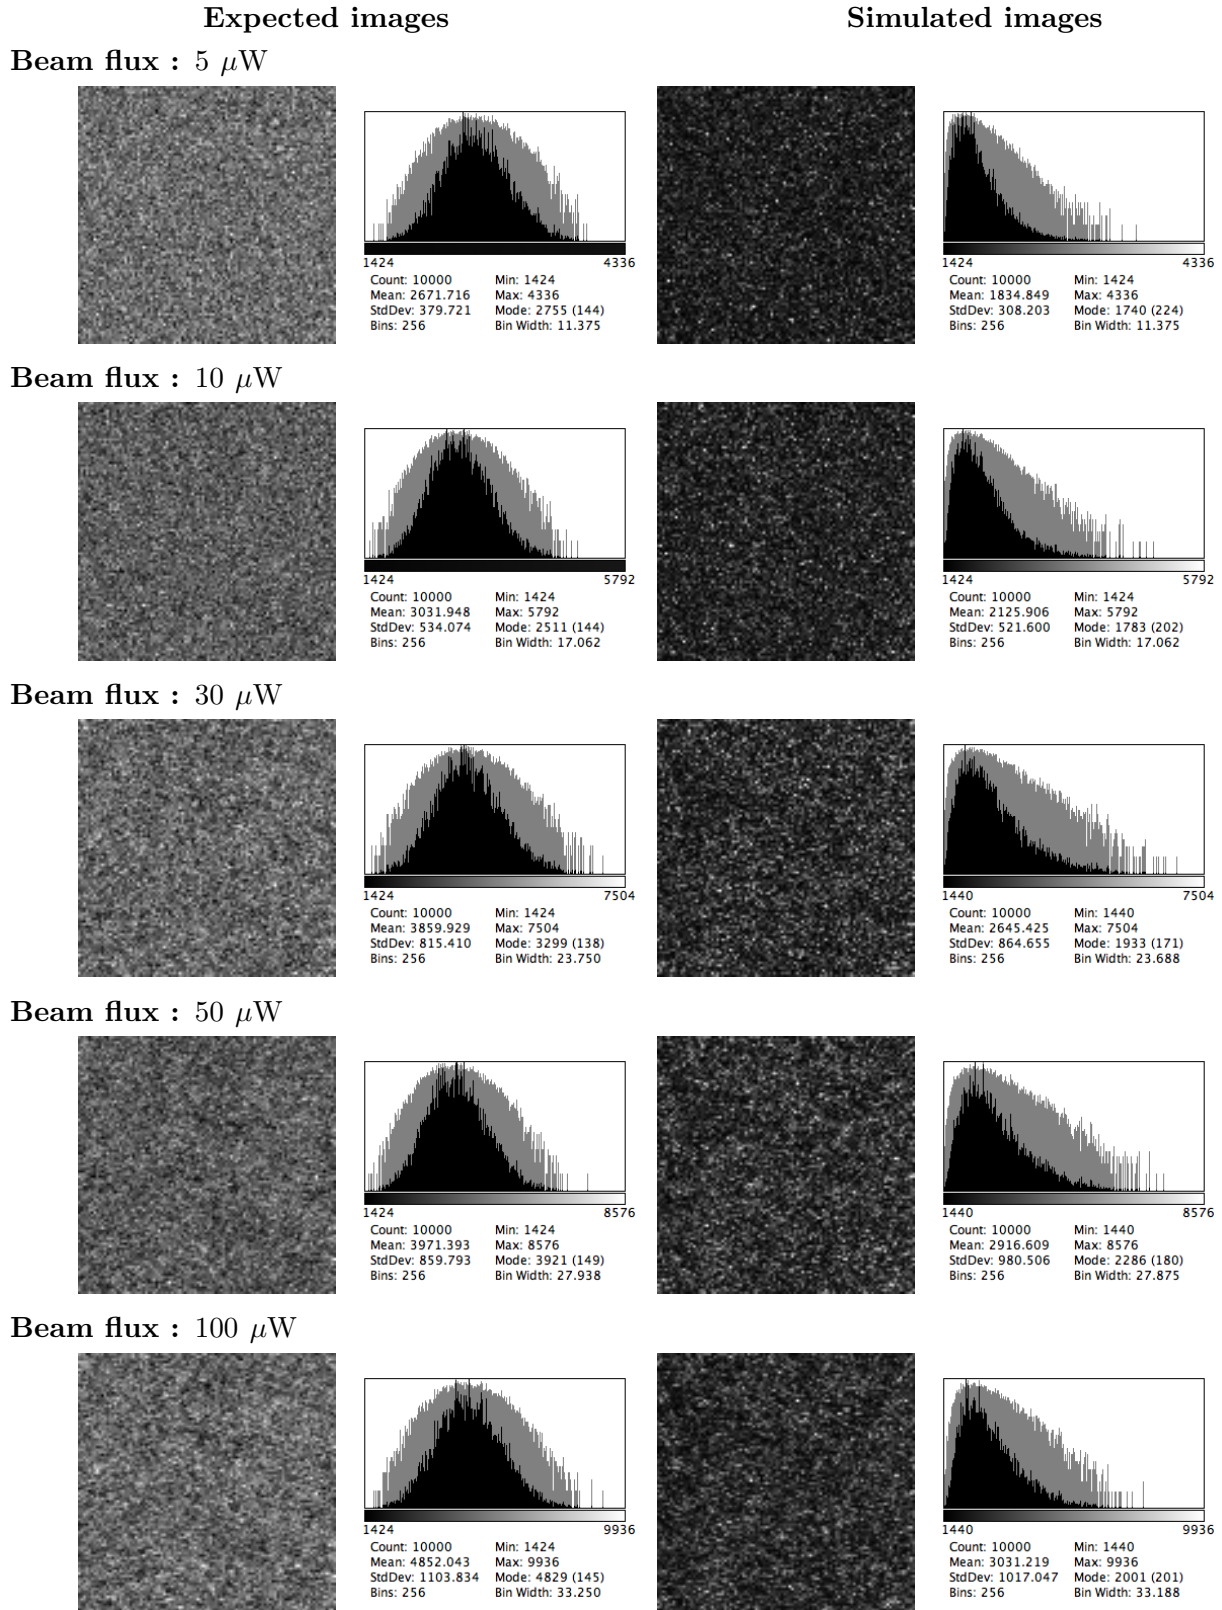

S2 Fig. S2.4: Comparison of *in vitro* images ( $100 \times 100$  pixels) and intensity histograms. Log-scaled intensity histograms are shown in grey color. The PMT dark current has not been simulated yet.



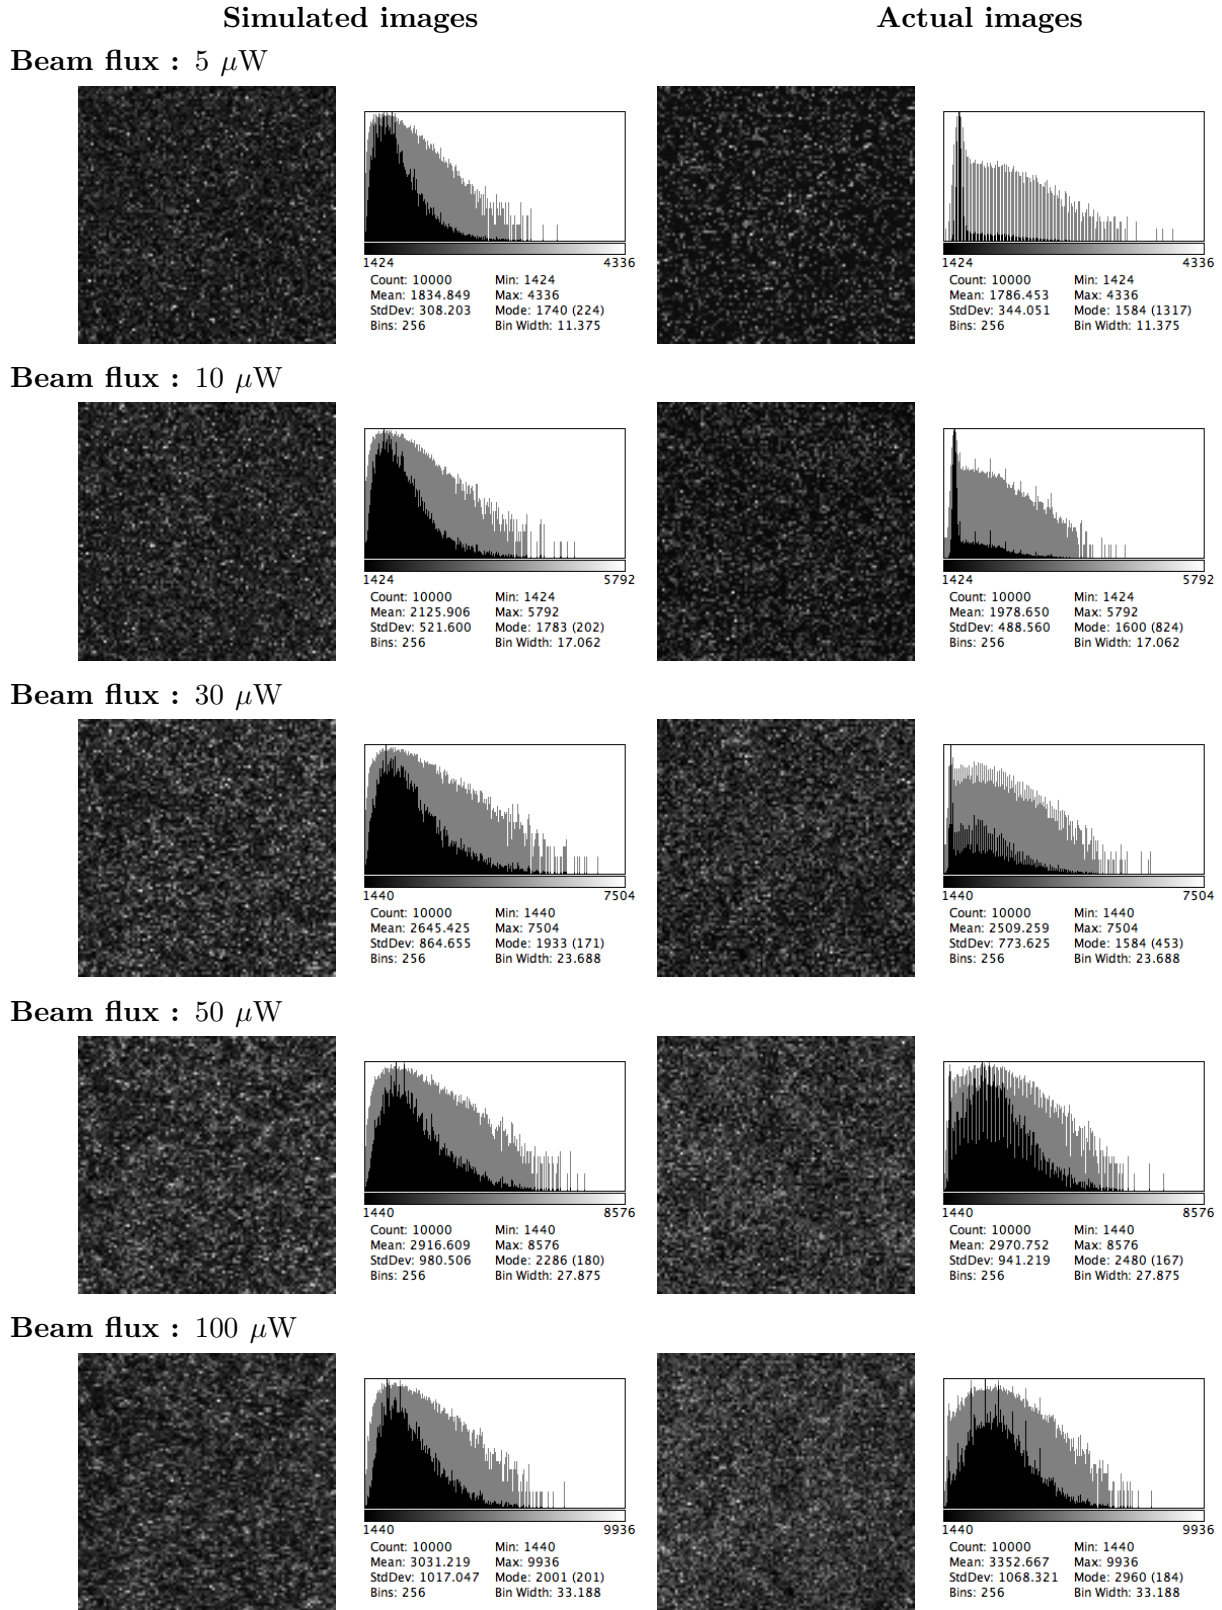

S2 Fig. S2.5: Comparison of *in vitro* images ( $100 \times 100$  pixels) and intensity histograms. Log-scaled intensity histograms are shown in grey color. The PMT dark current has not been simulated yet.

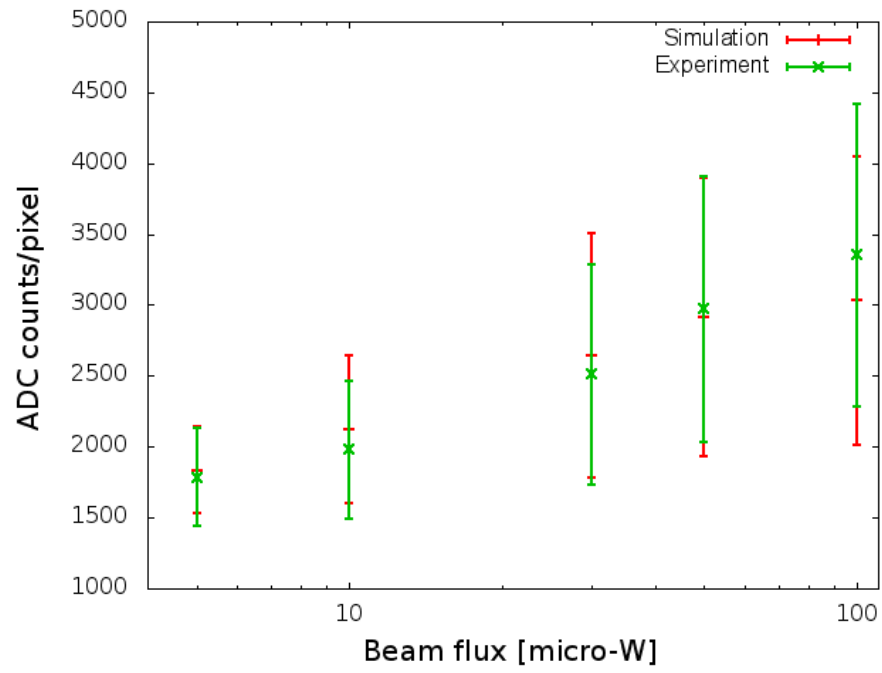

S2 Fig. S2.6: Linearity is shown for various beam flux. Experiment (green) and simulation (red).
